# Supplementary material for: A review and evaluation of the methodology for digitising 2D fracture networks and topographic lineaments in GIS
Source: Copernicus journal article supplement (doi:10.5194/se-2019-184), 2019-12-10
Supplement: Supplementary file 1 [file se-2019-184-supplement.pdf]

# Supplementary material

## Calculating geometries in QGIS field calculator

Area: \$area

Length: \$length

Orientation: Degrees(azimuth(start\_point(\$geometry), end\_point(\$geometry)))

## Calculating basic fracture parameters in Python

*#Import key modules including geopandas, numpy and pandas*

Import geopandas as gpd

Import numpy as np

Import pandas as pd

You may need install geopandas using either:

#Anaconda install

conda install -c conda-forge geopandas

or

#pip install

pip install geopandas

*#Import fracture trace shape file and analysis window shapefile as Geopandas dataframes.*

*(Terms in italics and capitals need to be changed).*

df=gpd.read\_file(r"*LINK TO SHAPE FILE LOCATION OF FRACTURE TRACES*")

aoi=gpd.read\_file(r"*LINK TO SHAPE FILE LOCATION OF AREAS*")

*#Group dataframe by each analysis window.*

df2=df[df['*ANALYSIS\_WINDOW*']== '*ANALYSIS\_WINDOW\_REFERENCE*']

aoi2=aoi[aoi['*ANALYSIS\_WINDOW*']== '*ANALYSIS\_WINDOW\_REFERENCE*']

## For making individual density and spacing calculations

*#Make python array of lengths and area from shapefile geometries.*

df2\_length=np.array(df2.geometry.length)

aoi2\_area=np.array(aoi2.geometry.area)

***#Calculate sum of lengths.***

```
df2_length_sum=np.sum(df2.length)
```

***#Finally, calculate fracture density based total fracture length and area.***

```
density=df2_length_sum/aoi2_area
```

***#In addition, as before calculate spacing, which is the reciprocal of Density.***

```
spacing=aoi2_area /df2_length_sum
```

***For making density and spacing calculations for multiple groups of data***

***#Add length from the geometry column to a new column***

```
df['length']=df.geometry.length
```

***#Group dataframe based on digitisation areas***

```
df_group=df.groupby(df. ANALYSIS_WINDOW)
```

***#Calculate the sum lengths for each group and convert to pandas dataframe***

```
df_group_lengths=pd.DataFrame(np.sum(df_group.length))
```

***#Add Location column to dataframe***

```
df_group_lengths['Location']=df_group_lengths.index
```

***#Merge main data frame with area dataframe based on location***

```
df3=pd.merge(df_group_lengths, aoi, how='inner', on='ANALYSIS_WINDOW')
```

***#Calculate density and intensity in new a columns***

```
df3['density']=df3.length/df3.area
```

```
df3['spacing']=df3.area/df3.length
```

***#Export as excel file***

```
df3.to_excel(r"LINK TO LOCATION TO CREATE EXCEL FILE IN")
```
